# Supplementary material
Source: MDPI journal article supplement (https://www.mdpi.com/2073-4433/12/4/459)
Supplement: s1 [file s1]

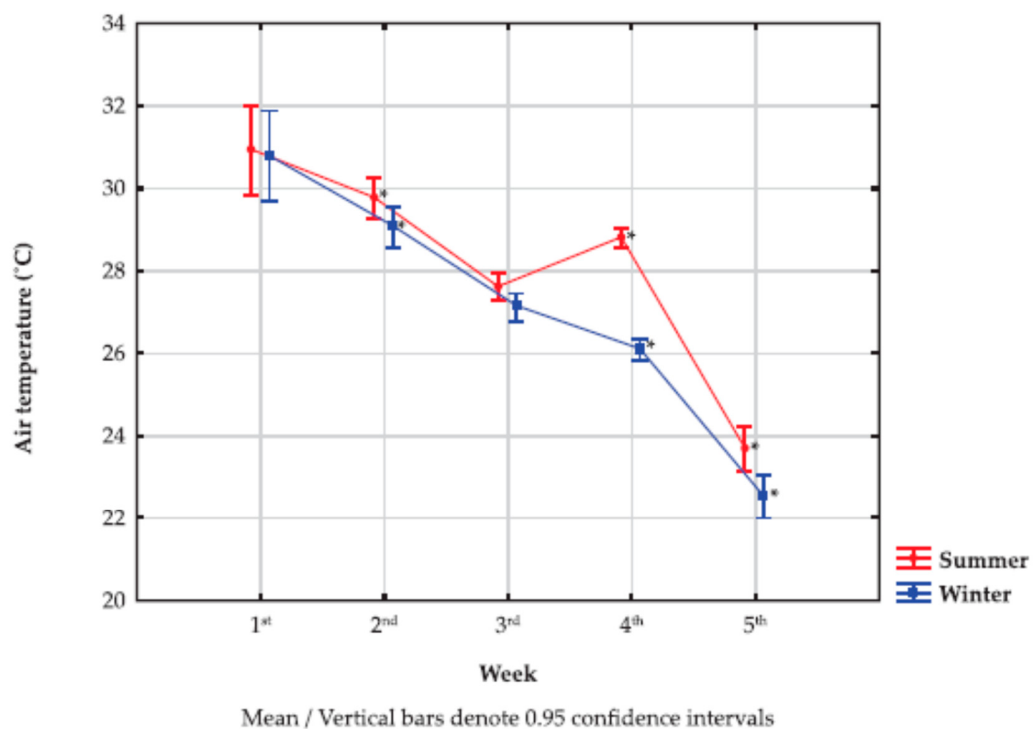

**Figure S1.** Air temperature inside broiler house according to fattening weeks in summer and winter. All values within the same season differ significantly ( $p < 0.05$ ). \* Values within the same weeks differ significantly between the seasons ( $p < 0.05$ ).

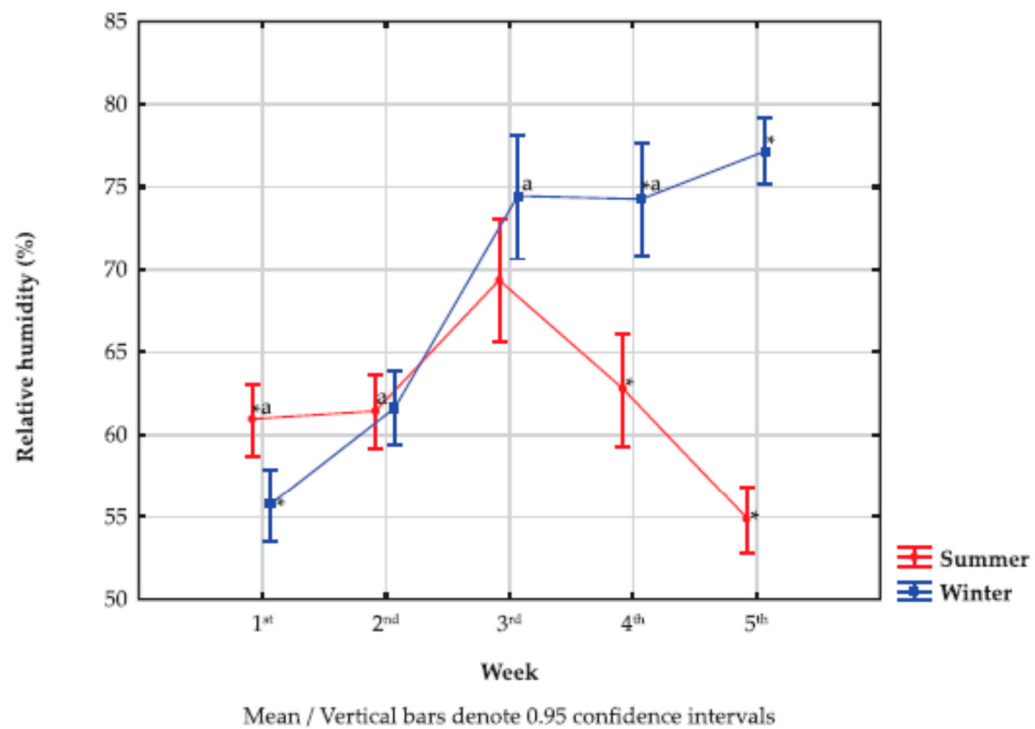

**Figure S2.** Relative humidity inside broiler house according to fattening weeks in summer and winter. <sup>a</sup> All values within the same season differ significantly ( $p < 0.05$ ), except for the marked ones. <sup>\*</sup> Values within the same weeks differ significantly between the seasons ( $p < 0.05$ ).

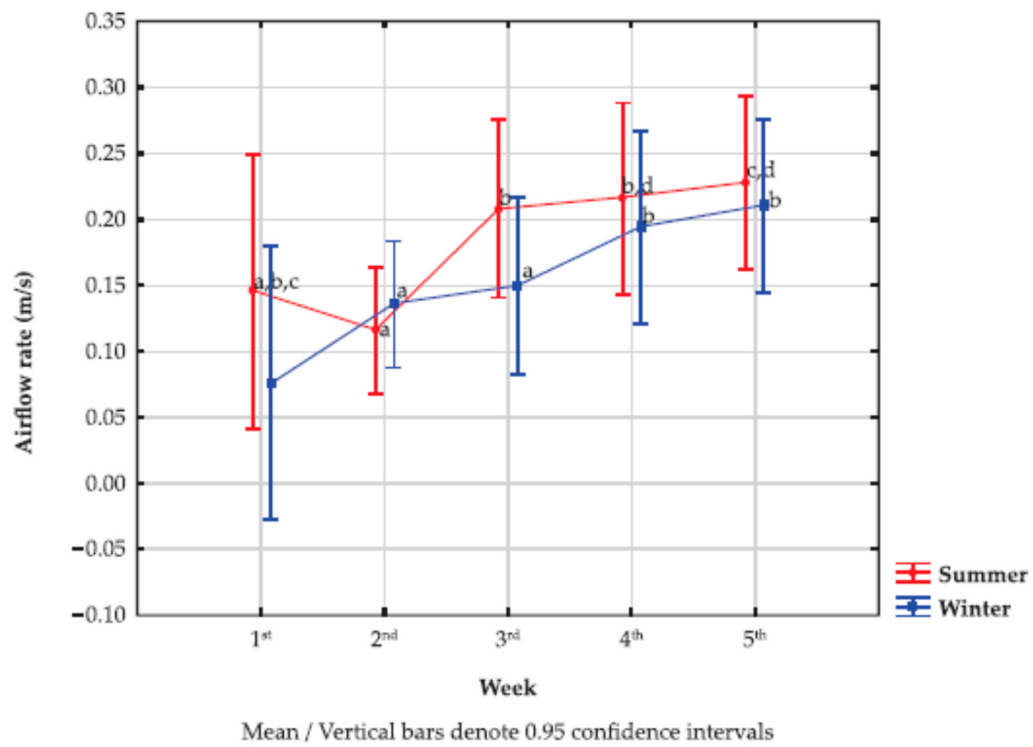

**Figure S3.** Airflow rate inside broiler house according to fattening weeks in summer and winter. <sup>a,b,c,d</sup> All values within the same season differ significantly ( $p < 0.05$ ), except for those marked with the same letter.

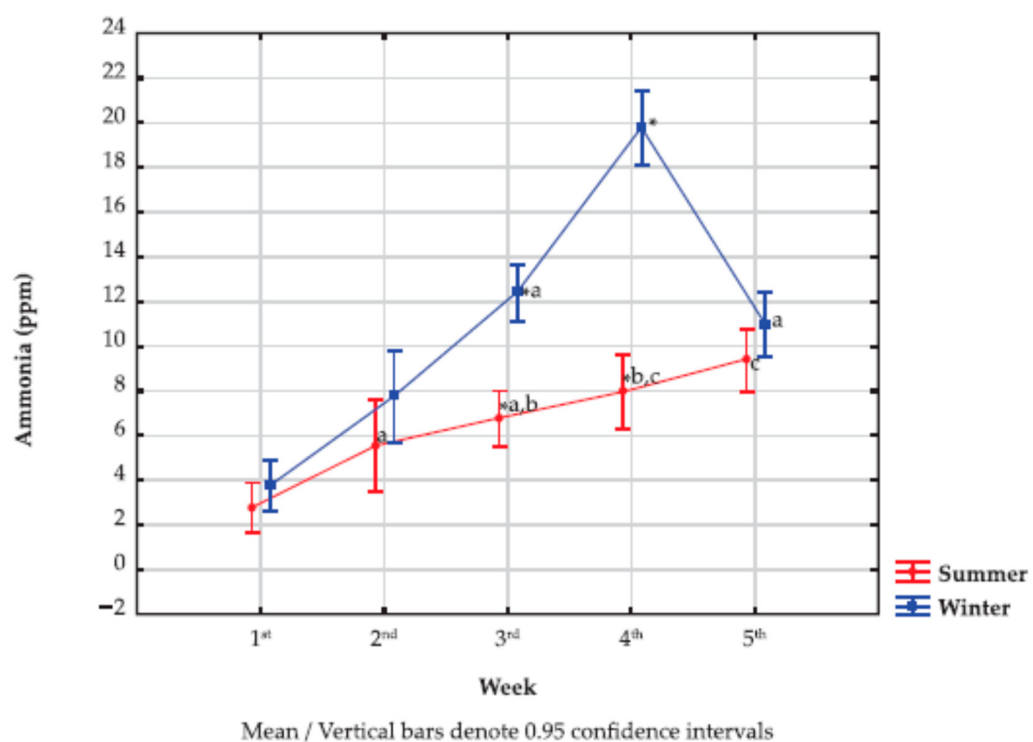

**Figure S4.** Air ammonia concentration in broiler house according to fattening weeks in summer and winter. <sup>a,b,c</sup> All values within the same season differ significantly ( $p < 0.05$ ), except for those marked with the same letter. \* Values within the same weeks differ significantly between the seasons ( $p < 0.05$ ).

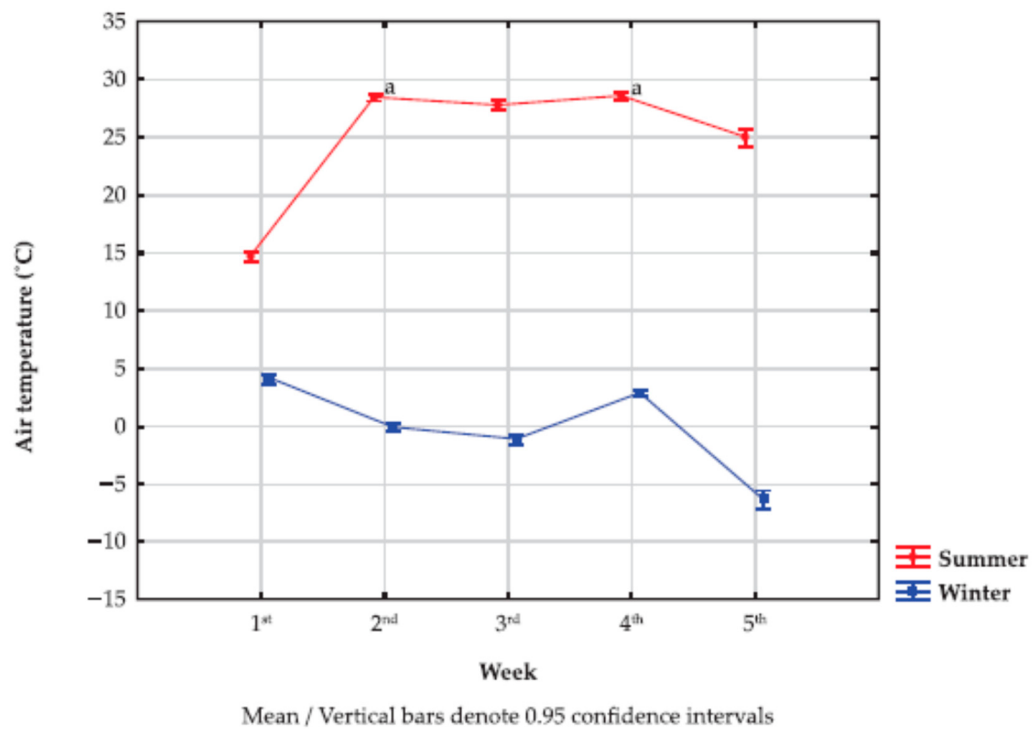

**Figure S5.** Air temperature outside broiler house according to fattening weeks in summer and winter. <sup>a</sup> All values within the same season differ significantly ( $p < 0.05$ ), except for the marked ones. All values within the same weeks differ significantly between the seasons ( $p < 0.05$ ).

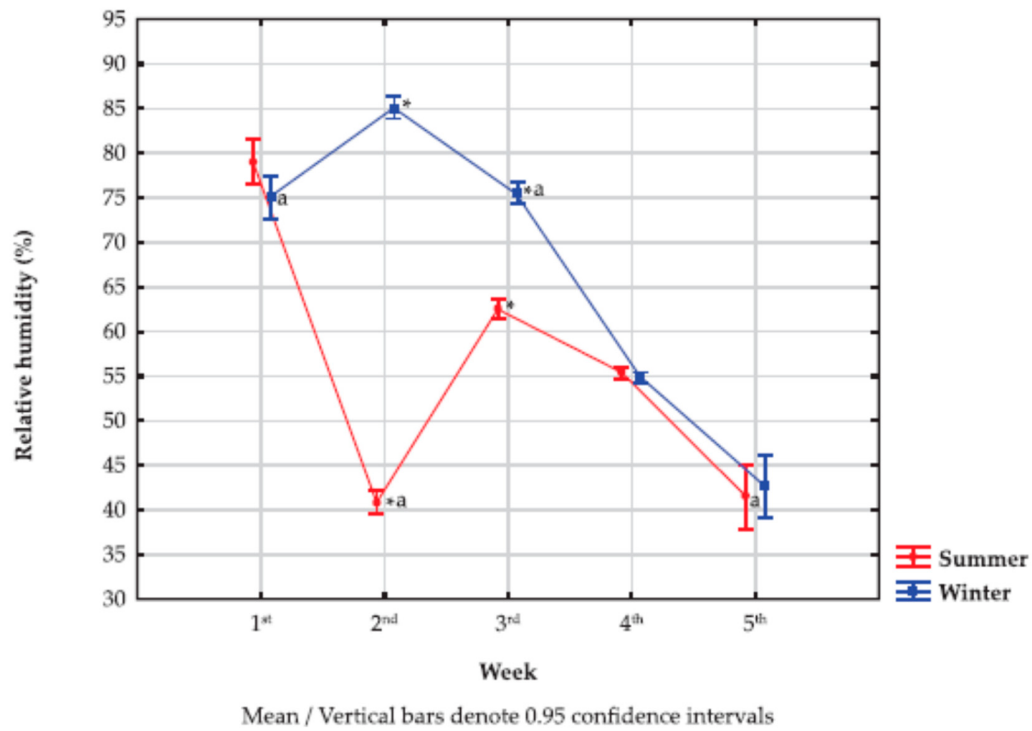

**Figure S6.** Relative humidity outside broiler house according to fattening weeks in summer and winter. <sup>a</sup> All values within the same season differ significantly ( $p < 0.05$ ), except for the marked ones. <sup>\*</sup> Values within the same weeks differ significantly between the seasons ( $p < 0.05$ ).

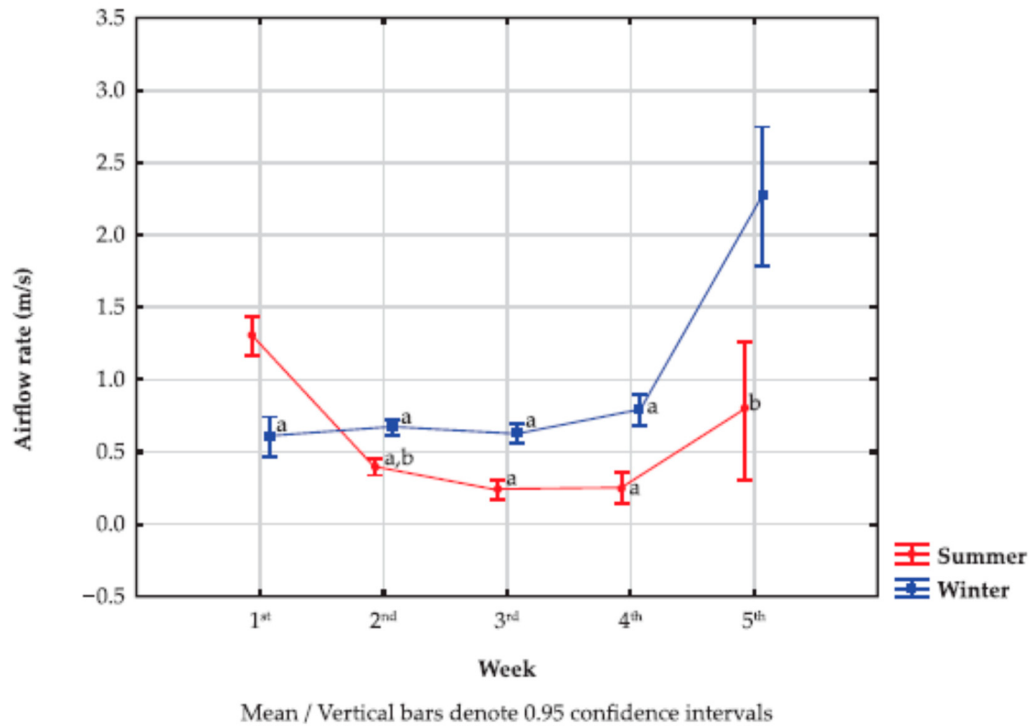

**Figure S7.** Airflow rate outside broiler house according to fattening weeks in summer and winter. <sup>a,b</sup> All values within the same season differ significantly ( $p < 0.05$ ), except for those marked with the same letter. All values within the same weeks differ significantly between the seasons ( $p < 0.05$ ).
